# Supplementary material for: Can heterometallic 1-dimensional chains support current rectification?
Source: Royal Society of Chemistry journal article supplement (doi:10.1039/c3cc45063e), 2013-01-01
Supplement: c3cc45063e.pdf [file c3cc45063e.pdf]

# Can heterometallic 1-dimensional chains support current rectification?

Daniel DeBrincat, Oliver Keers and John E. McGrady\*

## Supporting information.

### Computational methods

All calculations of gas-phase electronic structure were performed using the Amsterdam Density Functional package ADF2012<sup>1</sup> package and the BP86 functional.<sup>2</sup> A double- $\zeta$  Slater-type basis set, extended with a single polarization function, was used to describe the main group atoms, while cobalt was modeled with a triple- $\zeta$  basis set. Electrons in orbitals up to and including 1s {C, N}, 2p {Cl}, 3p {Cr, Mn, Co} and 4p {Mo} were considered part of the core and treated in accordance with the frozen core approximation. The local density approximation was employed for the optimizations,<sup>3</sup> along with the local exchange-correlation potential of Vosko, Wilk and Nusair<sup>4</sup> and gradient corrections to exchange and correlation proposed by Becke and Perdew (BP86).<sup>5</sup> Different configurations were defined using the ‘occupations’ key. All structures were optimized using the gradient algorithm of Versluis and Ziegler.<sup>6</sup> Transport calculations were performed with ATK11.2.3<sup>7,8</sup> package using the gradient corrected PBE functional.<sup>9</sup> The methodology combines a density functional theory treatment of the electronic structure with the Keldysh non-equilibrium Green’s function approach to simulating coherent transport.<sup>10</sup> All atoms were treated with double- $\zeta$  basis set, extended with single polarization function. Core electrons were described by norm-conserving pseudopotentials.<sup>11</sup> The electronic structure of the two-probe systems at equilibrium was converged using a 100 Ry mesh cut-off, finite temperature of 300K at the electrodes, and the real space density constraint at the electrodes. Sampling of the Brillouin zone was performed using a Monkhorst-Pack grid<sup>12</sup> with 300 k-points along the transport direction. In the calculation of the transmission spectra and currents, a 5 x 5 grid was used to sample the Brillouin zone, and the bias window was sampled

at 0.01 eV intervals. The initial spin density for the two-probe calculations was polarized to be consistent with the net spin densities of the isolated molecules in their gas phase ground states. The scattering region contained the EMAC sandwiched between 4 x 4 layer of the Au (111) surface of the source and the drain, respectively. The sulphur atoms of the two NCS<sup>-</sup> ligands are located in a hollow site on the Au (111) surface with Au-S distance 2.52 Å. The precise details of the contact geometry remain a significant issue in all transport calculations – the ‘hollow-site’ geometry with a gold-sulfur distance of 2.52 Å (corresponding to a distance of ~1.9 Å between the sulfur and the surface) adopted here has been established as the global minimum for many examples of sulfur coordination to Au (111)<sup>13</sup> and is used in the majority of comparative studies.<sup>14</sup> The transmission spectra are not influenced strongly by alternative choices of contact geometry.

**Figure S1** Comparison of optimised and X-ray crystallographic structural parameters.

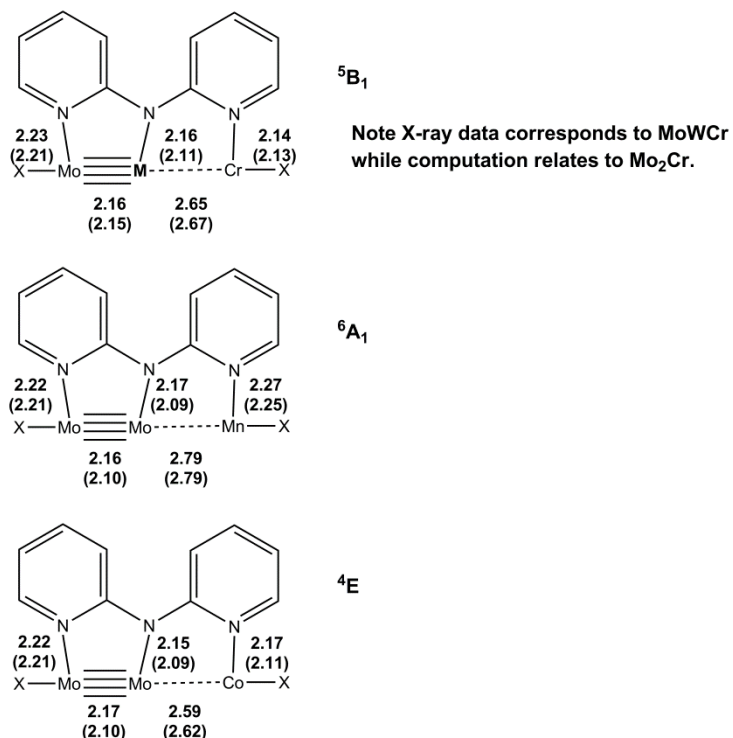

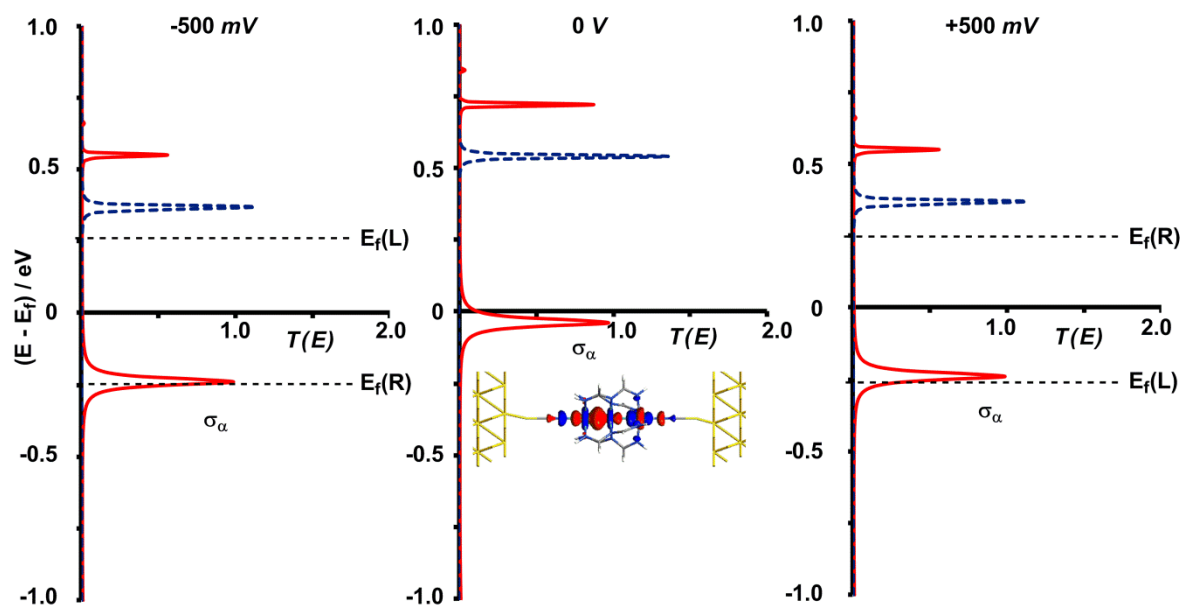

Figure S2 Bias-dependence of the transmission spectra for Mo<sub>2</sub>Cr.

**Optimised Cartesian coordinates and total energies of Mo<sub>2</sub>Cr, Mo<sub>2</sub>Mn and Mo<sub>2</sub>Co.**

| Mo <sub>2</sub> Cr (dpa) <sub>4</sub> (NCS) <sub>2</sub> |              | <sup>5</sup> B <sub>1</sub> | E=-644.90 eV |
|----------------------------------------------------------|--------------|-----------------------------|--------------|
| S                                                        | 0.000000000  | 0.000000000                 | -7.404126000 |
| S                                                        | 0.000000000  | 0.000000000                 | 7.447030000  |
| C                                                        | 0.000000000  | 0.000000000                 | -5.791980000 |
| C                                                        | 0.000000000  | 0.000000000                 | 5.836557000  |
| N                                                        | 0.000000000  | 0.000000000                 | -4.591682000 |
| N                                                        | 0.000000000  | 0.000000000                 | 4.637168000  |
| Mo                                                       | 0.000000000  | 0.000000000                 | -2.272369000 |
| Mo                                                       | 0.000000000  | 0.000000000                 | -0.111881000 |
| Cr                                                       | 0.000000000  | 0.000000000                 | 2.542077000  |
| N                                                        | -1.147116000 | -1.908201000                | -2.243923000 |
| N                                                        | -1.907213000 | 1.147086000                 | -2.245245000 |
| N                                                        | 1.907213000  | -1.147086000                | -2.245245000 |
| N                                                        | 1.147116000  | 1.908201000                 | -2.243923000 |
| N                                                        | -1.626318000 | 1.406242000                 | 0.048946000  |
| N                                                        | -1.405348000 | -1.626771000                | 0.050303000  |
| N                                                        | 1.626318000  | -1.406242000                | 0.048946000  |
| N                                                        | 1.405348000  | 1.626771000                 | 0.050303000  |
| N                                                        | -1.828197000 | -1.088703000                | 2.286798000  |
| N                                                        | 1.092319000  | -1.828076000                | 2.286609000  |
| N                                                        | -1.092319000 | 1.828076000                 | 2.286609000  |
| N                                                        | 1.828197000  | 1.088703000                 | 2.286798000  |
| C                                                        | -1.290019000 | -2.647036000                | -3.371103000 |
| C                                                        | -1.806328000 | -3.928233000                | -3.377444000 |
| C                                                        | -2.158539000 | -4.509147000                | -2.153443000 |
| C                                                        | -2.034719000 | -3.766904000                | -0.994064000 |
| C                                                        | -1.569606000 | -2.439097000                | -1.051046000 |
| C                                                        | -2.258435000 | -1.674238000                | 1.125348000  |
| C                                                        | -3.575407000 | -2.181727000                | 1.051316000  |
| C                                                        | -4.401951000 | -2.148570000                | 2.156085000  |
| C                                                        | -3.931896000 | -1.594795000                | 3.350130000  |
| C                                                        | -2.656061000 | -1.063952000                | 3.355870000  |

|   |              |              |              |
|---|--------------|--------------|--------------|
| H | -0.947804000 | -2.163162000 | -4.285253000 |
| H | -1.894455000 | -4.470701000 | -4.318262000 |
| H | -2.262823000 | -4.205041000 | -0.022620000 |
| H | -3.944307000 | -2.560039000 | 0.099397000  |
| H | -4.543596000 | -1.551416000 | 4.250547000  |
| H | -2.244525000 | -0.590417000 | 4.247065000  |
| C | 2.645722000  | -1.289036000 | -3.372828000 |
| C | 3.926379000  | -1.806663000 | -3.380129000 |
| C | 4.506572000  | -2.162190000 | -2.156754000 |
| C | 3.764483000  | -2.039416000 | -0.997125000 |
| C | 2.437709000  | -1.571396000 | -1.052897000 |
| C | 1.673987000  | -2.259540000 | 1.123782000  |
| C | 2.176863000  | -3.578103000 | 1.047577000  |
| C | 2.143994000  | -4.404832000 | 2.152093000  |
| C | 1.596426000  | -3.932879000 | 3.348272000  |
| C | 1.069382000  | -2.655554000 | 3.355909000  |
| H | 0.599613000  | -2.242810000 | 4.248579000  |
| H | 1.554157000  | -4.544518000 | 4.248701000  |
| H | 2.550879000  | -3.947897000 | 0.094272000  |
| H | 4.202408000  | -2.270147000 | -0.026221000 |
| H | 4.468841000  | -1.893930000 | -4.321109000 |
| H | 2.161770000  | -0.945232000 | -4.286305000 |
| C | 2.656061000  | 1.063952000  | 3.355870000  |
| C | 3.931896000  | 1.594795000  | 3.350130000  |
| C | 4.401951000  | 2.148570000  | 2.156085000  |
| C | 3.575407000  | 2.181727000  | 1.051316000  |
| C | 2.258435000  | 1.674238000  | 1.125348000  |
| C | 1.569606000  | 2.439097000  | -1.051046000 |
| C | 2.034719000  | 3.766904000  | -0.994064000 |
| C | 2.158539000  | 4.509147000  | -2.153443000 |
| C | 1.806328000  | 3.928233000  | -3.377444000 |
| C | 1.290019000  | 2.647036000  | -3.371103000 |
| H | 0.947804000  | 2.163162000  | -4.285253000 |
| H | 1.894455000  | 4.470701000  | -4.318262000 |
| H | 2.262823000  | 4.205041000  | -0.022620000 |
| H | 3.944307000  | 2.560039000  | 0.099397000  |
| H | 4.543596000  | 1.551416000  | 4.250547000  |
| H | 2.244525000  | 0.590417000  | 4.247065000  |
| C | -2.645722000 | 1.289036000  | -3.372828000 |
| C | -3.926379000 | 1.806663000  | -3.380129000 |
| C | -4.506572000 | 2.162190000  | -2.156754000 |
| C | -3.764483000 | 2.039416000  | -0.997125000 |
| C | -2.437709000 | 1.571396000  | -1.052897000 |
| C | -1.673987000 | 2.259540000  | 1.123782000  |
| C | -2.176863000 | 3.578103000  | 1.047577000  |
| C | -2.143994000 | 4.404832000  | 2.152093000  |
| C | -1.596426000 | 3.932879000  | 3.348272000  |
| C | -1.069382000 | 2.655554000  | 3.355909000  |
| H | -0.599613000 | 2.242810000  | 4.248579000  |
| H | -1.554157000 | 4.544518000  | 4.248701000  |
| H | -2.550879000 | 3.947897000  | 0.094272000  |
| H | -4.202408000 | 2.270147000  | -0.026221000 |
| H | -4.468841000 | 1.893930000  | -4.321109000 |
| H | -2.161770000 | 0.945232000  | -4.286305000 |
| H | 5.539037000  | -2.512569000 | -2.109438000 |
| H | 2.525181000  | -5.424961000 | 2.076221000  |
| H | -2.525181000 | 5.424961000  | 2.076221000  |
| H | -5.539037000 | 2.512569000  | -2.109438000 |

|   |              |              |              |
|---|--------------|--------------|--------------|
| H | 2.507127000  | 5.542179000  | -2.105307000 |
| H | -5.420627000 | -2.534154000 | 2.081920000  |
| H | -2.507127000 | -5.542179000 | -2.105307000 |
| H | 5.420627000  | 2.534154000  | 2.081920000  |

**Mo<sub>2</sub>Mn (dpa)<sub>4</sub> (NCS)<sub>2</sub>      <sup>6</sup>A<sub>1</sub>      E=-644.99 eV**

|    |              |              |              |
|----|--------------|--------------|--------------|
| S  | 0.000000000  | 0.000000000  | -7.307665000 |
| S  | 0.000000000  | 0.000000000  | 7.550773000  |
| C  | 0.000000000  | 0.000000000  | -5.696951000 |
| C  | 0.000000000  | 0.000000000  | 5.946073000  |
| N  | 0.000000000  | 0.000000000  | -4.496895000 |
| N  | 0.000000000  | 0.000000000  | 4.746522000  |
| Mo | 0.000000000  | 0.000000000  | -2.208579000 |
| Mo | 0.000000000  | 0.000000000  | -0.047122000 |
| Mn | 0.000000000  | 0.000000000  | 2.745753000  |
| N  | -1.127466000 | -1.910041000 | -2.210962000 |
| N  | -1.909425000 | 1.128854000  | -2.210193000 |
| N  | 1.909425000  | -1.128854000 | -2.210193000 |
| N  | 1.127466000  | 1.910041000  | -2.210962000 |
| N  | -1.633896000 | 1.414820000  | 0.082662000  |
| N  | -1.413450000 | -1.634773000 | 0.082061000  |
| N  | 1.633896000  | -1.414820000 | 0.082662000  |
| N  | 1.413450000  | 1.634773000  | 0.082061000  |
| N  | -1.895767000 | -1.182173000 | 2.320326000  |
| N  | 1.182620000  | -1.896342000 | 2.321332000  |
| N  | -1.182620000 | 1.896342000  | 2.321332000  |
| N  | 1.895767000  | 1.182173000  | 2.320326000  |
| C  | -1.272165000 | -2.642798000 | -3.342907000 |
| C  | -1.820179000 | -3.909884000 | -3.360670000 |
| C  | -2.203339000 | -4.486571000 | -2.143478000 |
| C  | -2.074150000 | -3.752399000 | -0.980832000 |
| C  | -1.574893000 | -2.435355000 | -1.026121000 |
| C  | -2.312242000 | -1.685314000 | 1.126352000  |
| C  | -3.648050000 | -2.121299000 | 0.975951000  |
| C  | -4.507812000 | -2.104926000 | 2.056723000  |
| C  | -4.051433000 | -1.641090000 | 3.293509000  |
| C  | -2.751225000 | -1.172392000 | 3.361541000  |
| H  | -0.909297000 | -2.164660000 | -4.251420000 |
| H  | -1.909865000 | -4.446562000 | -4.304824000 |
| H  | -2.327680000 | -4.186100000 | -0.013724000 |
| H  | -4.002639000 | -2.433540000 | -0.005530000 |
| H  | -4.691120000 | -1.617082000 | 4.175093000  |
| H  | -2.351759000 | -0.761009000 | 4.289975000  |
| C  | 2.641393000  | -1.274580000 | -3.342372000 |
| C  | 3.907300000  | -1.825211000 | -3.360842000 |
| C  | 4.483372000  | -2.210427000 | -2.144054000 |
| C  | 3.749973000  | -2.079902000 | -0.981059000 |
| C  | 2.434047000  | -1.577600000 | -1.025603000 |
| C  | 1.682945000  | -2.314063000 | 1.126691000  |
| C  | 2.116142000  | -3.650638000 | 0.975876000  |
| C  | 2.102176000  | -4.509370000 | 2.057351000  |
| C  | 1.642778000  | -4.051322000 | 3.295020000  |
| C  | 1.174681000  | -2.750834000 | 3.363169000  |
| H  | 0.765434000  | -2.350427000 | 4.292125000  |
| H  | 1.621146000  | -4.690150000 | 4.177200000  |
| H  | 2.424801000  | -4.006377000 | -0.006282000 |
| H  | 4.183435000  | -2.334915000 | -0.014289000 |

|   |              |              |              |
|---|--------------|--------------|--------------|
| H | 4.443382000  | -1.915612000 | -4.305105000 |
| H | 2.163716000  | -0.910180000 | -4.250421000 |
| C | 2.751225000  | 1.172392000  | 3.361541000  |
| C | 4.051433000  | 1.641090000  | 3.293509000  |
| C | 4.507812000  | 2.104926000  | 2.056723000  |
| C | 3.648050000  | 2.121299000  | 0.975951000  |
| C | 2.312242000  | 1.685314000  | 1.126352000  |
| C | 1.574893000  | 2.435355000  | -1.026121000 |
| C | 2.074150000  | 3.752399000  | -0.980832000 |
| C | 2.203339000  | 4.486571000  | -2.143478000 |
| C | 1.820179000  | 3.909884000  | -3.360670000 |
| C | 1.272165000  | 2.642798000  | -3.342907000 |
| H | 0.909297000  | 2.164660000  | -4.251420000 |
| H | 1.909865000  | 4.446562000  | -4.304824000 |
| H | 2.327680000  | 4.186100000  | -0.013724000 |
| H | 4.002639000  | 2.433540000  | -0.005530000 |
| H | 4.691120000  | 1.617082000  | 4.175093000  |
| H | 2.351759000  | 0.761009000  | 4.289975000  |
| C | -2.641393000 | 1.274580000  | -3.342372000 |
| C | -3.907300000 | 1.825211000  | -3.360842000 |
| C | -4.483372000 | 2.210427000  | -2.144054000 |
| C | -3.749973000 | 2.079902000  | -0.981059000 |
| C | -2.434047000 | 1.577600000  | -1.025603000 |
| C | -1.682945000 | 2.314063000  | 1.126691000  |
| C | -2.116142000 | 3.650638000  | 0.975876000  |
| C | -2.102176000 | 4.509370000  | 2.057351000  |
| C | -1.642778000 | 4.051322000  | 3.295020000  |
| C | -1.174681000 | 2.750834000  | 3.363169000  |
| H | -0.765434000 | 2.350427000  | 4.292125000  |
| H | -1.621146000 | 4.690150000  | 4.177200000  |
| H | -2.424801000 | 4.006377000  | -0.006282000 |
| H | -4.183435000 | 2.334915000  | -0.014289000 |
| H | -4.443382000 | 1.915612000  | -4.305105000 |
| H | -2.163716000 | 0.910180000  | -4.250421000 |
| H | 5.506131000  | -2.589258000 | -2.105617000 |
| H | 2.429673000  | -5.543205000 | 1.931584000  |
| H | -2.429673000 | 5.543205000  | 1.931584000  |
| H | -5.506131000 | 2.589258000  | -2.105617000 |
| H | 2.579547000  | 5.510277000  | -2.104586000 |
| H | -5.541172000 | -2.433932000 | 1.931015000  |
| H | -2.579547000 | -5.510277000 | -2.104586000 |
| H | 5.541172000  | 2.433932000  | 1.931015000  |

**Mo<sub>2</sub>Co (dpa)<sub>4</sub> (NCS)<sub>2</sub>**      **<sup>4</sup>E**      **E=-642.72 eV**

|    |              |              |              |
|----|--------------|--------------|--------------|
| S  | 0.000000000  | 0.000000000  | -7.279164000 |
| S  | 0.000000000  | 0.000000000  | 7.279576000  |
| C  | 0.000000000  | 0.000000000  | -5.670278000 |
| C  | 0.000000000  | 0.000000000  | 5.668976000  |
| N  | 0.000000000  | 0.000000000  | -4.470100000 |
| N  | 0.000000000  | 0.000000000  | 4.472429000  |
| Mo | 0.000000000  | 0.000000000  | -2.228237000 |
| Mo | 0.000000000  | 0.000000000  | -0.060879000 |
| Co | 0.000000000  | 0.000000000  | 2.528276000  |
| N  | -1.120801000 | -1.916444000 | -2.215646000 |
| N  | -1.926129000 | 1.101225000  | -2.220788000 |
| N  | 1.926129000  | -1.101225000 | -2.220788000 |
| N  | 1.120801000  | 1.916444000  | -2.215646000 |

|   |              |              |              |
|---|--------------|--------------|--------------|
| N | -1.620068000 | 1.415031000  | 0.060419000  |
| N | -1.420789000 | -1.613240000 | 0.068253000  |
| N | 1.620068000  | -1.415031000 | 0.060419000  |
| N | 1.420789000  | 1.613240000  | 0.068253000  |
| N | -1.878451000 | -1.063379000 | 2.282621000  |
| N | 1.076865000  | -1.872484000 | 2.277129000  |
| N | -1.076865000 | 1.872484000  | 2.277129000  |
| N | 1.878451000  | 1.063379000  | 2.282621000  |
| C | -1.256593000 | -2.664043000 | -3.338806000 |
| C | -1.803516000 | -3.931807000 | -3.345157000 |
| C | -2.197439000 | -4.493055000 | -2.123786000 |
| C | -2.078614000 | -3.744158000 | -0.969401000 |
| C | -1.577461000 | -2.428433000 | -1.026843000 |
| C | -2.306636000 | -1.636357000 | 1.124114000  |
| C | -3.635980000 | -2.099271000 | 1.013069000  |
| C | -4.484777000 | -2.032797000 | 2.100814000  |
| C | -4.019776000 | -1.488309000 | 3.300133000  |
| C | -2.725025000 | -0.999571000 | 3.328122000  |
| H | -0.886429000 | -2.199285000 | -4.251071000 |
| H | -1.884176000 | -4.480944000 | -4.282990000 |
| H | -2.336889000 | -4.166284000 | 0.001483000  |
| H | -3.996461000 | -2.468304000 | 0.053985000  |
| H | -4.650219000 | -1.417278000 | 4.185963000  |
| H | -2.323275000 | -0.526143000 | 4.223232000  |
| C | 2.685571000  | -1.207405000 | -3.338896000 |
| C | 3.971443000  | -1.710919000 | -3.338480000 |
| C | 4.536409000  | -2.093742000 | -2.115587000 |
| C | 3.774851000  | -2.008167000 | -0.966548000 |
| C | 2.444529000  | -1.547998000 | -1.030600000 |
| C | 1.669733000  | -2.289810000 | 1.124223000  |
| C | 2.176296000  | -3.604634000 | 1.026278000  |
| C | 2.129433000  | -4.448069000 | 2.119184000  |
| C | 1.559840000  | -3.993785000 | 3.311030000  |
| C | 1.031116000  | -2.714658000 | 3.327115000  |
| H | 0.539363000  | -2.322419000 | 4.216589000  |
| H | 1.501406000  | -4.620700000 | 4.200244000  |
| H | 2.564051000  | -3.959587000 | 0.072509000  |
| H | 4.198649000  | -2.258000000 | 0.005823000  |
| H | 4.530117000  | -1.767274000 | -4.272273000 |
| H | 2.215552000  | -0.847943000 | -4.252704000 |
| C | 2.725025000  | 0.999571000  | 3.328122000  |
| C | 4.019776000  | 1.488309000  | 3.300133000  |
| C | 4.484777000  | 2.032797000  | 2.100814000  |
| C | 3.635980000  | 2.099271000  | 1.013069000  |
| C | 2.306636000  | 1.636357000  | 1.124114000  |
| C | 1.577461000  | 2.428433000  | -1.026843000 |
| C | 2.078614000  | 3.744158000  | -0.969401000 |
| C | 2.197439000  | 4.493055000  | -2.123786000 |
| C | 1.803516000  | 3.931807000  | -3.345157000 |
| C | 1.256593000  | 2.664043000  | -3.338806000 |
| H | 0.886429000  | 2.199285000  | -4.251071000 |
| H | 1.884176000  | 4.480944000  | -4.282990000 |
| H | 2.336889000  | 4.166284000  | 0.001483000  |
| H | 3.996461000  | 2.468304000  | 0.053985000  |
| H | 4.650219000  | 1.417278000  | 4.185963000  |
| H | 2.323275000  | 0.526143000  | 4.223232000  |
| C | -2.685571000 | 1.207405000  | -3.338896000 |
| C | -3.971443000 | 1.710919000  | -3.338480000 |

|   |              |              |              |
|---|--------------|--------------|--------------|
| C | -4.536409000 | 2.093742000  | -2.115587000 |
| C | -3.774851000 | 2.008167000  | -0.966548000 |
| C | -2.444529000 | 1.547998000  | -1.030600000 |
| C | -1.669733000 | 2.289810000  | 1.124223000  |
| C | -2.176296000 | 3.604634000  | 1.026278000  |
| C | -2.129433000 | 4.448069000  | 2.119184000  |
| C | -1.559840000 | 3.993785000  | 3.311030000  |
| C | -1.031116000 | 2.714658000  | 3.327115000  |
| H | -0.539363000 | 2.322419000  | 4.216589000  |
| H | -1.501406000 | 4.620700000  | 4.200244000  |
| H | -2.564051000 | 3.959587000  | 0.072509000  |
| H | -4.198649000 | 2.258000000  | 0.005823000  |
| H | -4.530117000 | 1.767274000  | -4.272273000 |
| H | -2.215552000 | 0.847943000  | -4.252704000 |
| H | 5.571900000  | -2.433950000 | -2.060962000 |
| H | 2.514396000  | -5.466153000 | 2.035553000  |
| H | -2.514396000 | 5.466153000  | 2.035553000  |
| H | -5.571900000 | 2.433950000  | -2.060962000 |
| H | 2.573261000  | 5.516461000  | -2.074781000 |
| H | -5.514352000 | -2.383432000 | 2.007753000  |
| H | -2.573261000 | -5.516461000 | -2.074781000 |
| H | 5.514352000  | 2.383432000  | 2.007753000  |

---

<sup>1</sup> (a) te Velde, G.; Bickelhaupt, F. M.; van Gisbergen, S. J. A.; Fonseca Guerra, C.; Baerends, E. J.; Snijders J. G.; Ziegler, T. *J. Comp. Chem.* **2001**, *22*, 931. (b) Fonseca Guerra, C.; Snijders, J. G.; te Velde G.; Baerends, E.J. *Theor. Chem. Acc.* **1998**, *99*, 391 (c) ADF2012, SCM, Theoretical Chemistry, Vrije Universiteit, Amsterdam, The Netherlands, <http://www.scm.com>.

<sup>2</sup> Perdew, J. P.; Burke, K.; Ernzerhof, M. *Phys. Rev. Lett.*, **1996**, *77*, 3865.

<sup>3</sup> Parr R. G.; Yang, W. *Density Functional Theory of Atoms and Molecules*, Oxford University Press, Oxford, **1989**.

<sup>4</sup> Vosko, S. H.; Wilk L.; Nusair, M. *Can. J. Phys.* **1980**, *58*, 1200.

<sup>5</sup> (a) Becke, A. D. *Phys. Rev. A* **1988**, *38*, 3098; (b) Perdew, J. P. *Phys. Rev. B* **1986**, *33*, 8822.

<sup>6</sup> Versluis L.; Ziegler, T. *J. Chem. Phys.* **1988**, *88*, 322.

<sup>7</sup> <http://www.quantumwise.com/>

<sup>8</sup> (a) Brandbyge, M.; Mozos, J. -L.; Ordejon, P.; Taylor P.; Stokbro, K. *Phys. Rev. B.* **2002**, *65*, 165401. (b) Soler, J. M.; Artacho, E.; Gale, J. D.; Garcia, A.; Unquera, J.; Ordejon P.; Sanchez-Portal, D. *J. Phys.: Condensed Matter* **2002**, *14*, 2745. (c) Taylor, J.; Guo H.; Wang, J. *Phys. Rev. B.* **2001**, *63*, 245407.



- 
- <sup>9</sup> Perdew J. P. Zunger, A. *Phys. Rev. B* **1981**, *23*, 5048.
- <sup>10</sup> (a) Datta, S. *Electron Transport in Mesoscopic Systems*; Cambridge University press, Cambridge, UK, **1997**. (b) Datta, S. *Quantum Transport: Atom to Transistor*, Cambridge University Press, Cambridge, UK, **2005**. (c) Jortner, J. Nitzan A. Ratner, M. A. *Lecture Notes in Physics, Introducing Molecular Electronics*, Springer **2005**, 14. (d) Lindsay, S. *Farad. Disc.* **2006**, *131*, 403. (e) Smit, R. H. Noat, Y. Untiedt, C. Lang, N. D. van Hemert M. C. van Ruitenbeek, J. M. *Nature* **2002**, *419*, 906. (f) Yu, L. H. Keane, Z. K. Cizek, J. W. Cheng, L. Stewart, M. P. Tour J. M. Natelson, D. *Phys. Rev. Lett.* **2004**, *93*, 266802.
- <sup>11</sup> Troullier N.; Martins, J. L. *Phys. Rev. B* **1991**, *43*, 1993.
- <sup>12</sup> Monkhorst H. J.; Pack, J. D. *Phys. Rev. B* **1976**, *13*, 5188.
- <sup>13</sup> Toher C.; Sanvito, S. *Phys. Rev. B* **2008**, *77*, 155402.
- <sup>14</sup> (a) Cohen, R.; Stokbro, K.; Martin J. M. L.; Ratner, M. A. *J. Phys. Chem. C* **2007**, *111*, 14893. (b) Liu, H.; Yu, C.; Gao N.; Zhao, J. *ChemPhysChem* **2010**, *11*, 1895. (c) Tagami K.; Tsukuda, M. *J. Phys. Chem. B* **2004**, *108*, 6441.
